# Supplementary material for: Enhanced medium chain length-polyhydroxyalkanoate production by co-fermentation of lignin and holocellulose hydrolysates
Source: Royal Society of Chemistry journal article supplement (doi:10.1039/d1gc02725e), 2021-01-01
Supplement: d1gc02725e1.pdf [file d1gc02725e1.pdf]

Supplementary data

## **Enhanced medium chain length-polyhydroxyalkanoate production**

### **by co-fermentation of lignin and holocellulose hydrolysates**

**Jorge Arreola-Vargas**<sup>a, b</sup>, **Xianzhi Meng**,<sup>c</sup> **Yun-yan Wang**,<sup>c</sup> **Arthur J. Ragauskas**,<sup>d, e</sup> **Joshua S. Yuan**<sup>a, b\*</sup>

<sup>a</sup> Synthetic and Systems Biology Innovation Hub, Texas A&M University, College Station, TX 77843, USA

<sup>b</sup> Department of Plant Pathology and Microbiology, Texas A&M University, College Station, TX 77843, USA

<sup>c</sup> Department of Chemical & Biomolecular Engineering, University of Tennessee, Knoxville, TN, 37996, USA

<sup>d</sup> Biosciences Division, Oak Ridge National Laboratory, Oak Ridge, TN, 37831, USA

<sup>e</sup> Department of Forestry, Wildlife and Fisheries, Center for Renewable Carbon, The University of Tennessee Institute of Agriculture, Knoxville, TN, 37996, USA

\*Corresponding author

E-mail address: *syuan@tamu.edu*

## Supplementary data

**Table S1.** ANOVA of the CCD for optimization of the mcl-PHA production at different OD and SSC concentrations

| <b>Source</b> | <b>Sum of Squares</b> | <b>df</b> | <b>Mean Square</b> | <b>F value</b> | <b>P value</b> |
|---------------|-----------------------|-----------|--------------------|----------------|----------------|
| A:OD          | 0.08704               | 1         | 0.08704            | 7.93           | 0.0373         |
| B:SSC         | 0.0753132             | 1         | 0.0753132          | 6.86           | 0.0471         |
| AA            | 0.0250353             | 1         | 0.0250353          | 2.28           | 0.1913         |
| AB            | 0.238144              | 1         | 0.238144           | 21.71          | 0.0055         |
| BB            | 0.0575106             | 1         | 0.0575106          | 5.24           | 0.0707         |
| Error total   | 0.0548544             | 5         | 0.0109709          |                |                |
| Total (corr.) | 0.570149              | 10        |                    |                |                |

## Supplementary data

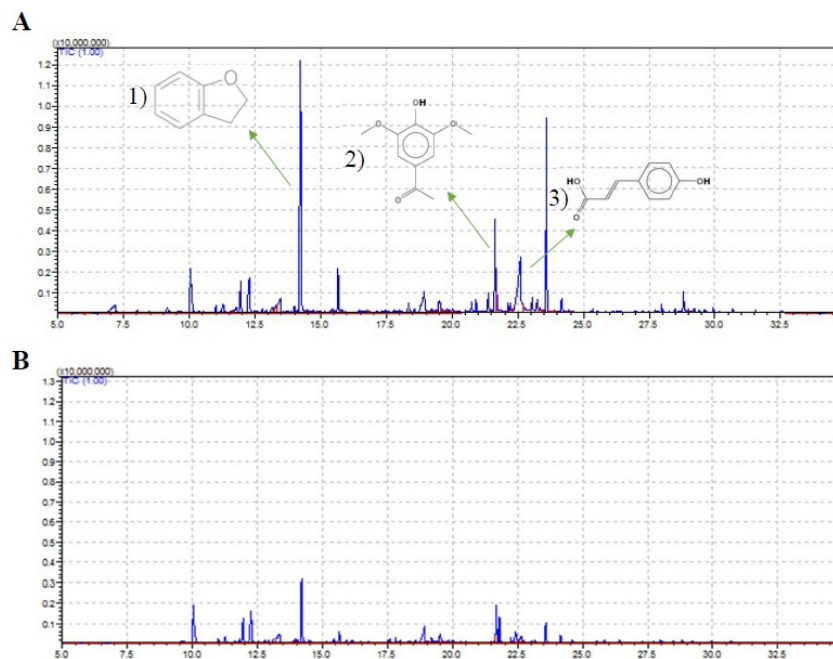

**Fig. S1.** GC-MS spectra of the consumption of the main lignin derivatives found in AH during fermentation at optimal conditions. A) Before fermentation, B) After fermentation. 1) Coumaran, 2) Ethanone, 3) Coumaric acid.
